# Supplementary material for: Association of weaning preparedness with extubation outcome of mechanically ventilated patients in medical intensive care units: a retrospective analysis
Source: PeerJ. 2020 Apr 13;8:e8973. doi: 10.7717/peerj.8973 (PMC7161570; doi:10.7717/peerj.8973)
Supplement: Supplemental Information 1 — Clinical and bedside physiologic assessment data of the included patients. [file peerj-08-8973-s001.xlsx]

## Sheet: 復原_工作表1
sn	gender	age	arf_type	et_days	failure	niv_use	weansnow_w	weansnow_e	weansnow_a	weansnow_n	weansnow_s	weansnow_n2	weansnow_o	weansnow_w2	ws_total	gcs	pimax	pemax	rr	vt	ve	rsbi	cm_heart_dis	cm_lung_dis	cm_acrf	cm_hypertension	cm_dm	cm_malignancy	apacheII	icu_days
1	0	93	2	21	0	0	0	0	0	0	0	0	1	0	1	15	-45	25	17	288	4.9	58.6	1	1	0	0	0	1	48	48
2	1	76	2	17	0	0	0	0	0	0	0	0	0	0	0	15	-40	40	17	648	11.66	44	0	1	0	0	1	0	22	42
3	1	74	4	10	1	1	0	0	0	0	0	0	0	1	1	10	-35	50	16	420	6.72	38	0	0	1	1	1	0	32	24
4	0	34	1	2	0	0	0	0	0	0	0	0	0	0	0	15	-40	46	18	480	8.6	37.5	1	0	0	1	0	0	7	8
5	0	53	1	27	1	1	0	0	0	0	0	0	0	1	1	3	-45	40	30	367	11	81.7	0	0	1	1	0	0	21	17
6	0	24	2	2	1	1	0	1	0	0	0	0	0	0	1	15	-60	60	22	316	8.2	65	0	1	0	0	0	1	12	137
7	1	91	1	21	0	0	0	0	0	0	1	0	1	0	2	15	-35	60	26	423	11	61.4	1	0	0	1	1	0	23	109
8	0	61	1	5	0	0	0	0	0	0	0	0	0	0	0	13	-60	40	17	552	9.39	30.8	0	1	0	0	0	1	27	7
9	0	58	2	4	0	0	0	0	0	0	0	0	0	0	0	15	-40	40	20	349	6.97	57.3	1	0	0	1	1	0	13	6
10	0	78	2	9	0	0	0	0	0	0	0	0	0	0	0	15	-40	35	20	432	8.64	46.7	0	1	0	0	0	0	20	13
11	1	69	2	4	0	0	0	0	0	0	0	0	0	0	0	13	-40	60	10	450	4.5	22	0	1	0	1	0	0	12	4
12	0	57	2	6	0	0	0	0	0	0	1	0	0	0	1	13	-60	50	24	368	8.83	65	1	1	0	0	0	0	20	8
13	0	83	2	27	0	0	0	0	0	1	1	0	0	0	2	15	-45	50	27	377	10.2	71.6	0	0	0	0	0	1	29	28
14	1	70	1	3	1	1	0	0	0	0	0	0	0	0	0	15	-35	35	22	504	11.1	43	0	0	1	0	0	0	26	33
15	1	80	2	43	0	0	0	0	0	0	0	0	0	0	0	13	-36	46	20	350	7	57	1	1	0	1	0	0	17	26
16	0	64	2	18	0	0	0	0	0	1	0	0	0	0	1	15	-30	40	27	278	7.23	97	0	0	0	0	0	1	26	4
17	1	70	4	4	0	0	0	0	0	1	0	0	0	1	2	7	-35	35	22	510	11.21	43	0	1	1	0	0	1	28	34
18	0	85	2	8	0	0	0	0	0	0	0	0	0	1	1	12	-35	50	28	310	8.7	90	1	0	0	0	0	1	22	9
19	1	56	2	41	0	0	0	0	0	0	0	0	0	0	0	15	-40	50	16	338	5.4	43	1	1	0	1	1	0	8	35
20	0	87	1	61	0	0	0	0	0	0	0	0	0	0	0	15	-30	20	32	310	9.92	103	1	1	0	0	0	1	12	62
21	1	93	1	15	1	1	0	0	0	0	0	0	0	0	0	15	-30	50	22	400	8.8	55	1	0	1	1	0	0	15	17
22	0	78	2	12	0	0	0	0	0	0	0	0	0	0	0	15	-40	50	18	632	11.38	28	0	0	0	0	0	1	22	6
23	1	74	4	3	0	0	0	0	0	0	0	0	0	0	0	13	-35	50	16	428	6.72	38	0	0	1	1	1	0	32	5
24	1	57	2	2	0	0	0	0	0	0	0	0	0	0	0	15	-50	60	15	498	7.47	33.2	1	0	1	1	0	0	24	3
25	0	50	2	5	0	0	0	0	0	0	0	0	0	0	0	15	-40	60	23	458	10	50	1	0	0	1	0	0	24	4
26	0	70	1	2	0	0	0	0	0	0	0	0	0	0	0	15	-60	120	15	600	9	25	1	1	0	1	0	0	16	6
27	1	76	2	22	1	1	0	0	0	0	0	0	0	0	0	15	-40	60	26	273	7.1	95	1	0	1	0	1	0	16	20
28	0	58	1	5	0	0	0	0	0	0	0	0	0	0	0	13	-40	50	24	425	10.2	56.5	0	0	0	1	0	0	15	7
29	1	74	2	3	0	0	0	0	0	0	0	0	0	0	0	13	-28	52	16	325	5.2	49	0	0	1	1	1	0	32	21
30	0	76	2	67	0	0	1	0	0	0	0	0	0	1	2	3	-21	20	25	312	7.8	80	0	0	0	0	0	1	25	67
31	0	63	1	30	0	0	0	0	0	0	0	0	0	0	0	13	-35	40	20	440	8.8	45.5	0	0	0	1	0	1	6	34
32	0	63	4	10	0	0	1	0	0	0	0	0	0	1	2	10	-20	20	32	274	8.77	116	0	0	0	0	0	1	34	12
33	0	79	2	2	0	0	0	0	0	0	0	0	0	1	1	10	-50	40	23	426	9.8	54	1	0	1	1	1	1	17	3
34	1	62	4	17	1	1	1	0	0	0	0	0	0	0	1	15	-18	20	21	323	6.8	65	0	0	0	0	0	1	15	19
35	0	66	1	4	0	0	0	0	0	0	0	0	0	0	0	13	-28	34	25	278	6.95	85	1	1	1	1	1	1	17	7
36	1	70	2	3	0	0	0	0	0	0	0	0	0	0	0	13	-50	60	14	506	7.08	28	1	0	0	0	0	0	14	4
37	1	57	1	10	0	0	0	0	0	0	0	0	0	0	0	13	-30	50	22	400	8.8	52	1	0	0	1	1	0	15	20
38	0	84	2	61	1	1	1	0	0	0	0	0	0	1	2	9	-10	10	34	153	5.2	222	0	1	1	1	0	1	21	8
39	1	70	2	7	0	0	0	0	0	0	0	0	0	0	0	15	-40	40	20	360	7.2	20	0	0	0	0	0	1	21	9
40	1	61	1	2	0	0	0	0	0	0	0	0	0	0	0	15	-40	50	13	684	8.9	13	1	0	1	0	0	0	14	7
41	0	47	2	7	0	0	0	0	0	0	0	0	0	0	0	15	-48	50	20	575	11.5	35	1	0	1	1	1	1	11	10
42	0	52	2	12	0	0	0	0	0	0	0	0	0	1	1	10	-40	50	24	517	12.4	46.2	0	0	0	0	1	0	25	16
43	0	59	2	3	0	0	0	1	0	0	0	0	0	0	1	15	-30	35	15	370	5.5	40.5	0	0	1	0	1	0	24	6
44	0	70	2	16	0	0	0	0	0	0	0	0	0	1	1	11	-35	50	23	493	11.34	24.7	0	1	0	1	1	0	21	18
45	0	54	1	7	0	0	0	0	0	0	0	0	0	1	1	4	-50	50	24	783	18.8	30	1	0	1	0	1	0	24	11
46	1	71	4	15	0	0	0	0	0	0	0	0	0	1	1	8	-30	35	33	272	9	121	0	0	1	0	0	0	39	15
47	0	67	2	3	0	0	0	0	0	0	0	0	0	0	0	15	-50	60	13	785	9	46.5	0	1	0	1	0	0	25	5
48	0	66	1	12	0	0	0	0	0	0	0	0	0	0	0	15	-30	35	16	400	6.4	40	0	0	0	0	0	1	17	15
49	0	67	4	3	0	0	0	0	0	0	0	0	0	1	1	11	-50	60	13	785	10.4	46.5	0	1	0	1	0	0	25	3
50	1	78	2	38	1	1	0	0	0	0	0	0	0	1	1	11	-35	40	16	241	3.86	66	0	0	0	1	1	1	21	44
51	0	75	2	10	0	0	0	0	0	0	0	0	0	0	0	14	-45	50	21	442	9.3	47.5	0	0	0	1	0	0	25	12
52	1	69	2	6	0	0	0	0	0	0	0	0	0	0	0	15	-35	40	18	248	4.4	72.5	0	1	0	0	0	1	21	11
53	0	65	2	10	0	0	0	0	0	0	0	0	0	0	0	15	-50	60	28	314	8.8	89	0	0	0	0	0	1	35	23
54	1	53	4	17	1	0	1	0	0	0	0	0	0	1	2	3	-20	22	20	305	6.1	65.6	0	0	1	0	0	1	15	17
55	0	56	4	4	0	0	0	0	0	0	0	0	0	1	1	11	-40	40	18	412	7.43	43.7	0	0	0	0	0	0	10	7
56	1	77	2	19	1	1	1	0	0	0	0	0	0	0	1	13	-35	50	35	298	10.1	117.5	0	0	0	1	0	1	42	23
57	0	73	4	34	1	0	0	0	0	0	0	0	0	1	1	3	-35	35	36	467	16.8	83.5	0	1	0	1	1	0	24	35
58	0	58	2	64	1	1	0	0	0	0	0	0	0	1	1	3	-40	35	39	610	23.8	64	0	1	0	0	0	1	29	29
59	0	70	1	9	0	1	0	0	0	0	0	0	0	0	0	15	-60	50	19	582	11.5	32.7	1	0	0	1	1	0	15	9
60	0	58	2	4	0	1	0	0	0	0	0	0	0	1	1	12	-40	35	20	505	10.1	39.6	0	0	1	0	1	1	21	2
61	0	59	2	14	0	1	0	0	0	0	0	0	0	0	0	13	-60	60	16	300	4.8	53.3	1	1	0	0	0	1	18	16
62	1	79	2	3	0	0	0	0	0	0	0	0	0	0	0	15	-30	40	18	315	6	43	1	0	0	1	1	0	8	4
63	0	53	4	13	0	1	0	0	0	0	0	0	0	1	1	11	-35	40	20	482	9.62	41.5	0	0	0	0	0	1	15	14
64	1	74	2	24	0	1	0	0	0	0	0	0	0	1	1	10	-50	60	22	347	7.64	63.4	1	1	1	1	0	1	21	15
65	1	69	2	6	0	1	0	0	0	0	0	0	0	1	1	3	-40	40	18	528	9.5	34	0	0	0	0	1	1	21	7
66	0	76	2	12	0	1	0	0	0	0	0	0	0	1	1	3	-35	40	16	407	6.5	34.3	0	1	0	0	0	1	16	12
67	0	70	2	10	0	0	0	0	0	0	0	0	0	0	0	15	-30	40	10	790	7.9	12.6	0	0	0	0	0	1	19	7
68	0	42	4	6	0	0	0	0	0	0	0	0	0	1	1	11	-50	60	33	517	17.08	63.8	0	0	1	0	0	0	11	7
69	0	88	2	8	0	0	1	0	0	0	0	0	0	1	2	3	-20	10	28	185	5.17	151	1	0	0	0	0	1	29	12
70	1	75	4	5	0	0	0	0	0	0	0	0	0	0	0	15	-30	45	16	587	9.4	27.3	0	0	0	0	0	1	25	18
71	1	40	1	6	0	0	0	0	0	0	0	0	0	0	0	13	-30	34	20	255	5.1	78	0	0	0	0	0	0	26	7
72	0	68	4	53	1	1	1	0	0	0	0	0	0	1	2	8	-25	15	28	338	9.48	82	0	0	0	0	0	1	33	53
73	1	36	2	5	0	0	0	0	0	0	0	0	0	1	1	3	-30	25	20	325	6.6	62	0	0	1	0	0	1	12	6
74	1	69	1	11	0	0	0	0	0	0	0	0	0	0	0	13	-35	40	25	264	6.6	95	0	0	1	1	0	0	27	14
75	0	60	4	34	1	1	0	0	0	0	0	0	0	1	1	5	-40	40	23	486	11.2	47	1	0	1	1	0	1	19	62
76	1	76	2	5	0	0	0	0	0	0	0	0	0	0	0	15	-35	60	20	395	7.9	51	1	0	0	1	0	0	15	9
77	1	52	4	14	0	0	1	0	0	0	0	0	0	1	2	10	-25	25	18	371	6.68	48.5	0	0	0	0	0	1	10	12
78	1	58	2	21	1	1	0	0	0	0	0	0	0	1	1	3	-35	35	21	477	10.03	44	1	0	0	1	1	1	29	23
79	0	69	4	10	1	1	0	0	0	0	0	0	0	0	0	15	-60	60	21	460	9.68	45.6	0	0	1	1	1	0	24	13
80	0	65	2	60	1	1	0	0	0	0	0	0	0	0	0	15	-60	60	18	463	8.3	38.8	0	0	0	0	1	1	12	60
81	1	83	1	6	1	1	1	0	0	0	0	0	0	0	1	15	-25	50	14	201	2.82	69.6	0	0	0	0	0	1	12	12
82	0	75	2	9	0	0	0	0	0	0	0	0	0	0	0	15	-35	45	16	412	6.6	38.8	1	0	0	1	0	0	18	19
83	1	71	2	11	0	0	0	0	0	0	0	0	0	0	0	15	-60	60	18	325	5.8	18	1	0	1	0	1	0	21	16
84	0	97	2	5	1	1	0	0	0	0	0	0	0	0	0	15	-30	35	21	326	6.65	66.5	0	1	1	1	1	0	15	12
85	1	53	4	16	1	1	1	0	0	0	0	0	0	1	2	3	-18	20	21	323	6.8	65	0	0	1	0	0	1	15	61
86	0	42	4	8	0	0	0	0	0	0	0	0	0	0	0	15	-50	60	22	648	14	54	0	0	0	0	0	1	13	7
87	1	59	1	7	0	0	0	0	0	0	0	0	0	0	0	15	-40	40	27	336	10.6	79	0	0	0	0	1	1	19	12
88	1	65	1	5	0	0	1	0	0	0	0	0	0	1	2	8	-30	30	18	152	2.7	118	0	0	0	1	0	0	13	12
89	1	82	1	8	0	0	0	0	0	0	0	0	0	0	0	15	-45	60	27	272	7.4	99	0	0	0	0	0	0	14	12
90	1	78	1	8	0	0	0	0	0	0	0	0	0	1	1	10	-30	60	20	336	6.7	60	1	0	0	1	0	0	19	11
91	0	74	1	11	0	0	0	0	0	0	0	0	0	1	1	8	-20	50	18	297	5.44	73	0	0	0	1	0	0	17	17
92	1	59	4	71	1	1	1	0	0	0	0	0	0	1	2	8	-16	14	19	125	2.32	152	0	0	0	1	0	0	27	9
93	0	61	2	4	0	0	0	0	0	0	0	0	0	1	1	8	-50	16	9	534	4.8	21	1	1	1	1	1	0	38	29
94	0	40	4	22	0	0	0	0	0	0	0	0	0	0	0	15	-50	30	15	543	8.15	28	0	0	0	0	0	1	23	21
95	0	75	2	7	0	0	0	0	0	0	0	0	0	0	0	15	-40	50	12	725	8.7	17	1	0	0	1	0	0	17	10
96	0	78	2	9	0	0	0	0	0	0	0	0	0	0	0	15	-60	60	15	681	10	22	0	0	0	1	0	0	23	11
97	1	79	2	29	1	0	1	0	0	0	0	0	0	1	2	3	-22	30	22	203	4.5	108	0	0	0	0	0	1	27	44
98	0	79	2	15	0	0	1	0	0	0	0	0	0	1	2	7	-49	35	32	583	19	54	0	0	0	0	0	0	26	19
99	0	59	2	10	0	0	0	0	0	0	0	0	0	0	0	15	-50	50	18	391	8.3	23	1	0	0	1	0	0	15	54
100	1	82	2	3	0	0	0	0	0	0	0	0	0	0	0	15	-45	45	19	428	9.5	44	0	0	1	1	1	0	20	4
101	0	62	2	9	0	0	0	0	0	0	0	0	0	0	0	15	-30	40	22	481	11.5	45	1	1	1	1	1	0	26	11
102	1	79	2	5	0	0	0	0	0	0	0	0	0	0	0	13	-30	40	22	481	11.55	46	0	0	0	0	0	1	24	73
103	0	71	2	3	0	0	0	0	0	0	0	0	0	0	0	15	-30	60	21	255	7.5	67	1	0	0	0	0	0	19	18
104	0	86	1	49	1	0	1	0	0	0	0	0	0	1	2	5	-25	35	27	299	8.1	18	0	0	0	0	0	0	21	49
105	0	59	2	20	0	0	0	0	0	0	0	0	0	0	0	15	-30	30	15	564	8.5	26	1	0	1	1	0	0	15	13
106	0	72	2	5	0	0	0	0	0	0	0	0	0	0	0	15	-30	50	23	352	8.1	65	1	1	0	1	1	0	32	39
107	1	85	2	6	0	0	0	0	0	0	0	0	0	0	0	15	-30	35	21	290	6.1	83	1	0	1	1	1	0	23	8
108	0	83	2	33	1	0	1	0	0	0	0	0	1	0	2	15	-35	30	36	307	11.1	117	0	1	0	0	0	1	29	33
109	0	82	2	10	0	1	1	0	0	0	0	0	0	1	2	7	-16	18	28	192	5.54	145	0	0	0	0	0	1	29	12
110	1	78	2	14	0	0	0	0	0	0	1	0	0	0	1	15	-30	35	21	390	8.2	54	0	0	1	0	0	1	40	20
111	0	76	2	16	1	1	1	0	0	0	0	0	0	0	1	15	-45	50	22	184	4	119	0	0	1	1	1	0	33	80
112	1	87	2	3	0	1	1	0	0	0	0	0	0	0	1	15	-25	50	22	256	5.7	85	1	1	1	1	1	0	12	39
113	0	82	2	4	1	1	1	0	0	0	0	0	0	1	2	7	-16	14	32	153	4.88	210	0	0	0	0	0	0	21	9
114	0	86	2	29	1	1	0	0	0	0	0	0	0	1	1	5	-30	25	21	219	4.6	95	1	0	1	1	0	0	17	36
115	0	49	2	7	1	0	0	0	0	0	0	0	0	0	0	13	-35	35	19	397	7.5	48	0	0	1	0	0	1	24	51
116	0	90	2	5	0	0	0	0	0	0	0	0	0	1	1	11	-40	60	15	273	4.1	55	0	0	1	0	0	0	36	7
117	0	84	2	19	1	1	1	0	0	0	0	0	0	0	1	13	-30	25	30	267	8	112	0	0	0	1	1	0	19	30
118	0	50	2	39	1	0	0	0	0	0	0	0	0	1	1	5	-35	50	20	325	6.5	62	0	0	1	0	0	0	25	71
119	1	87	2	21	0	0	1	0	0	0	0	0	0	1	0	13	-25	40	24	344	8.6	70	1	0	1	1	0	0	26	39
120	0	77	4	4	0	0	0	0	0	0	0	0	0	0	0	15	-38	60	20	425	8.7	52	0	0	0	0	0	1	23	12
121	0	60	1	4	0	0	0	0	0	0	0	0	0	1	1	10	-35	20	13	638	8.3	20	0	0	1	1	0	0	22	9
122	0	75	2	2	0	0	0	0	0	0	0	0	0	0	0	15	-40	60	24	420	10.1	57	1	0	1	0	0	1	22	2
123	1	66	3	6	0	0	0	0	0	0	0	0	0	1	1	4	-40	10	20	241	4.82	83	1	0	0	0	0	0	21	19
124	1	90	4	2	0	0	1	0	0	0	0	0	0	0	1	14	-25	25	22	314	7	70	1	0	0	0	0	0	21	3
125	0	66	1	81	1	0	0	0	0	0	0	0	0	0	0	13	-40	50	24	316	7.6	76	1	1	0	0	0	1	32	21
126	0	36	1	35	0	0	0	0	0	0	1	1	0	0	2	13	-50	60	16	631	12	25	0	0	0	0	0	1	41	40
127	1	70	1	12	0	0	0	0	0	0	0	0	0	0	0	13	-28	50	16	234	3.75	68	0	0	0	1	0	1	23	99
128	0	84	1	13	0	0	0	0	0	0	0	0	0	0	0	15	-40	28	23	344	7.9	67	0	1	0	0	0	0	31	16
129	1	57	1	2	0	0	1	0	0	0	0	0	0	0	1	15	-30	28	45	344	15.5	130	0	0	0	0	0	1	21	2
130	1	78	1	12	0	0	0	0	0	0	0	0	0	0	0	15	-25	30	21	276	5.46	91	1	0	0	1	0	0	19	13
131	0	88	4	4	0	0	0	0	0	0	0	0	0	0	0	14	-25	20	14	357	5	39	1	0	0	0	0	0	24	5
132	1	86	4	8	0	0	0	0	0	0	0	0	0	0	0	15	-28	30	10	284	2.84	35	1	0	1	1	1	0	29	12
133	1	92	2	8	1	1	0	0	0	0	0	1	0	1	2	5	-18	20	20	210	4.2	95	1	1	0	1	0	1	9	30
134	1	78	1	4	0	0	0	0	0	0	0	1	1	0	2	14	-40	35	10	481	4.81	21	0	0	0	1	0	1	10	11
135	1	82	1	6	1	1	0	0	0	1	1	0	0	0	2	14	-30	70	25	257	6.42	97	0	1	0	0	0	0	30	16
136	1	53	4	5	0	0	0	0	0	0	0	0	0	0	0	15	-45	45	13	932	12	14	0	0	0	0	0	0	19	13
137	1	75	1	4	0	1	0	0	0	0	0	0	0	0	0	15	-25	20	20	238	4.75	84	1	0	0	0	0	0	24	13
138	0	64	1	13	0	0	0	0	0	0	1	0	0	0	1	15	-60	60	20	458	9.16	43	0	0	0	0	0	1	21	17
139	0	62	3	8	1	0	0	1	0	0	0	0	0	0	1	6	-40	60	37	340	12.6	108	1	0	1	1	1	0	16	12
140	0	79	2	12	0	0	0	0	0	0	0	0	0	0	0	15	-40	60	14	659	9.23	21	1	0	0	1	0	1	27	16
141	1	86	2	29	1	1	1	1	0	0	0	0	0	1	3	6	-30	25	21	219	4.6	95	1	1	0	1	0	0	9	36
142	0	49	1	11	0	0	0	0	0	0	1	0	0	0	1	13	-40	40	25	380	9.5	66	0	1	0	0	0	1	17	13
143	0	66	3	4	0	0	1	0	0	0	0	0	0	0	1	15	-25	35	24	333	8	72	0	1	0	0	0	0	27	7
144	1	83	2	64	0	0	1	0	0	0	0	0	0	0	1	15	-38	36	42	297	12.5	141	0	0	1	1	0	1	34	60
145	0	88	1	69	1	1	0	0	0	0	0	0	0	0	0	13	-32	28	25	380	9.5	65	1	1	1	0	0	0	23	73
146	1	83	2	34	0	0	1	0	0	0	0	0	0	0	0	15	-30	32	25	146	6.3	163	0	0	1	1	0	1	34	37
147	0	46	2	84	1	0	1	0	0	0	0	0	0	1	2	3	-40	15	16	468	7.5	34	0	0	0	0	0	1	6	84
148	1	37	4	31	1	0	1	0	0	0	0	0	0	1	2	3	-32	36	46	404	18.6	114	0	0	0	0	0	0	23	31
149	0	74	2	11	0	0	0	0	0	0	0	0	0	0	0	13	-40	46	20	580	9.6	42	0	0	1	1	1	0	15	86
150	0	74	2	35	0	0	1	0	0	0	0	0	0	0	1	15	-40	60	33	415	13.1	79	0	0	1	1	1	0	15	14
151	1	71	4	63	1	0	0	0	0	0	0	0	0	0	0	15	-30	56	19	395	7	48	0	0	0	0	0	0	12	27
152	0	75	1	23	0	0	1	0	0	0	0	0	0	0	0	15	-35	30	28	364	11.2	76	1	0	0	1	0	0	23	10
153	0	56	4	2	0	0	0	0	0	0	0	0	0	0	0	15	-60	80	12	483	8.2	17	1	0	0	1	0	0	10	5
154	0	56	1	2	1	1	1	0	0	0	0	0	0	0	1	15	-45	60	26	507	13.2	51	1	0	0	1	0	0	12	4
155	0	56	4	3	0	0	0	0	0	0	0	0	0	0	0	15	-46	60	16	495	7.9	32	0	0	0	1	0	0	35	4
156	0	69	4	75	1	0	0	0	0	0	0	0	0	1	1	10	-42	50	23	398	9.2	58	0	0	0	0	0	0	14	23
157	0	76	4	6	1	1	0	0	0	0	0	0	1	0	1	13	-40	45	20	380	7.6	52	0	0	0	1	1	1	32	14
158	0	69	3	26	1	0	1	0	0	0	0	0	0	1	2	10	-50	60	18	617	11.1	29	0	1	0	0	0	1	16	26
159	1	51	1	25	0	0	0	0	0	0	0	0	0	1	1	12	-32	36	22	327	7.2	67	0	0	1	1	0	1	12	40
160	1	80	3	4	1	1	1	0	0	0	0	0	0	0	1	15	-40	60	28	155	4.3	180	0	1	1	1	1	0	29	7
161	0	65	4	14	0	0	1	0	0	0	0	0	0	1	2	10	-45	50	26	435	11.5	59	1	0	1	0	1	1	14	24
162	1	83	1	20	1	1	1	0	0	0	0	0	0	1	2	12	-28	60	27	225	6.1	120	0	0	0	0	0	1	13	36
163	1	80	1	6	0	0	0	0	0	0	0	0	0	0	0	15	-40	40	17	312	5.3	54	0	0	0	0	0	0	15	8
164	0	77	1	72	1	0	0	0	0	0	0	0	0	0	0	13	-40	45	18	412	8.5	58	0	0	0	1	0	0	25	25
165	1	55	4	3	1	0	1	0	0	0	0	0	0	1	2	12	-40	46	27	427	11.6	63	0	0	1	0	0	1	33	3
166	0	93	2	5	0	0	1	0	0	0	0	0	0	0	1	15	-30	25	17	358	6	47	0	1	0	1	0	0	11	7
167	0	71	4	6	0	0	0	0	0	0	0	0	0	0	0	15	-60	120	19	460	8.8	41	1	0	1	0	0	1	14	15
168	1	78	1	20	1	0	1	0	0	0	0	0	0	1	2	12	-5	10	30	80	2.4	375	0	0	0	1	1	0	15	19
169	0	56	1	4	0	0	0	0	0	0	0	0	0	0	0	15	-40	40	11	873	9.6	12	0	0	1	1	0	1	24	5
170	0	58	1	2	0	0	0	0	0	0	0	0	0	0	0	15	-40	60	20	650	10	31	1	0	0	1	0	0	6	9
171	0	65	1	3	0	0	0	0	0	0	0	0	0	0	0	15	-50	60	18	361	6.5	50	1	0	1	1	0	0	12	9
172	0	47	4	4	0	0	0	0	0	0	0	0	0	0	0	15	-50	60	12	776	9.3	15	0	0	0	0	0	1	16	7
173	0	73	3	6	0	0	0	0	0	0	0	0	0	0	0	15	-38	60	20	428	8.6	46	0	1	1	0	0	1	36	8
174	1	36	1	12	1	1	1	0	0	0	0	0	0	0	1	13	-28	30	35	322	11.3	108	0	0	0	0	0	1	21	18
175	0	85	4	15	1	0	0	0	0	0	0	0	0	0	0	13	-38	40	25	350	8.5	71	1	0	1	1	0	0	32	15
176	0	92	4	19	0	0	0	0	0	0	0	0	0	1	1	7	-40	60	20	310	6.2	65	0	0	1	0	0	0	28	16
177	0	71	3	4	1	1	0	0	0	0	0	0	1	0	1	15	-40	30	27	344	9.3	78	0	1	0	1	0	0	14	8
178	0	76	4	6	1	1	0	0	0	0	0	0	0	0	0	13	-40	45	20	380	7.6	52	0	0	0	0	0	1	32	14
179	0	72	4	87	1	0	0	0	0	0	0	1	0	0	1	15	-40	55	17	470	8	36	0	0	0	0	0	1	14	54
180	0	65	4	37	1	0	0	0	0	0	0	0	1	1	2	10	-32	28	32	328	10.5	98	0	0	0	0	0	1	16	40
181	0	61	2	30	1	0	1	0	0	0	0	1	0	0	2	15	-30	5	23	240	5.5	96	0	0	0	0	1	1	14	52
182	0	36	1	34	0	0	0	0	0	0	0	0	0	0	0	15	-60	60	29	364	10.6	79	0	0	1	1	0	0	12	13
183	0	60	4	4	0	0	0	0	0	0	0	0	0	0	0	15	-40	50	14	457	6.4	31	1	0	0	1	1	0	6	14
184	0	80	4	15	0	0	1	0	0	0	0	0	0	0	1	15	-60	30	21	630	13.2	33	1	0	0	0	0	0	26	19
185	0	69	4	26	0	0	1	0	0	0	1	0	0	1	3	8	-50	60	25	500	12.5	50	1	0	0	0	0	1	28	6
186	1	54	4	22	1	1	1	0	0	0	0	0	0	0	1	10	-12	18	28	150	4.2	187	0	0	0	0	0	1	14	61
187	1	68	1	57	1	1	1	0	0	0	0	0	0	1	2	8	-45	50	34	313	12.7	91	1	0	1	1	1	0	28	46
188	1	89	3	85	1	1	0	0	0	0	0	1	0	1	2	11	-30	45	32	172	5.5	186	1	0	1	1	0	0	10	45
189	0	40	2	53	1	0	1	0	0	0	1	1	0	0	3	15	-12	50	18	55	1	327	0	0	0	0	0	1	11	16
190	0	58	1	16	1	0	1	0	0	0	0	0	0	0	1	13	-35	35	26	454	11.8	58	0	0	0	0	0	1	14	16
191	1	74	4	63	1	0	1	0	0	0	0	0	0	1	2	3	-25	20	17	212	3.6	80	1	0	1	1	0	0	21	63
192	0	67	4	24	1	0	0	0	0	0	0	0	0	0	0	12	-40	46	18	312	6.7	48	0	0	0	0	0	1	31	23
193	1	62	3	2	0	0	1	0	0	0	0	0	0	0	1	15	-20	40	14	467	6.5	70	0	0	0	0	1	0	31	8
194	1	65	4	108	1	0	1	0	0	0	0	0	0	1	2	11	-32	42	28	150	4.2	186	0	0	0	0	0	1	15	109
195	0	73	1	14	1	1	0	0	0	0	0	0	0	0	0	14	-36	40	25	432	10.8	58	0	1	0	1	1	1	39	22
196	0	69	4	26	1	0	1	0	0	0	0	0	0	1	2	9	-50	60	25	500	12.45	50	1	0	0	1	0	1	25	26
197	1	86	4	7	0	0	1	0	0	0	0	0	0	1	2	6	-50	40	14	380	5.34	37	1	0	1	1	1	1	36	10
198	1	64	2	8	0	0	0	0	0	0	0	0	0	0	0	15	-30	50	16	325	5.2	49	0	0	1	1	0	1	15	10
199	0	28	1	20	0	0	1	0	0	0	0	0	0	0	0	15	-30	50	24	510	12.26	47	0	0	0	0	0	0	29	22
200	0	74	4	28	1	0	1	0	0	0	1	0	0	1	3	7	-30	30	20	234	7.5	137	1	0	1	0	0	0	25	28
201	1	92	4	8	0	0	1	0	0	0	0	0	0	0	1	14	-20	18	30	283	8.5	283	1	0	0	1	0	0	31	10
202	0	72	1	5	0	0	0	0	0	0	0	0	0	0	0	15	-42	60	18	355	6.4	51	1	0	0	0	0	0	14	7
203	0	69	1	13	0	0	0	0	0	0	0	0	0	0	0	15	-25	80	20	415	8.3	48	0	0	1	0	0	1	26	13
204	1	66	1	5	0	0	0	0	0	0	0	0	0	0	0	15	-36	60	26	330	8.6	74	0	0	0	1	1	1	18	5
205	0	53	4	22	0	0	0	0	0	0	0	0	0	0	0	15	-80	90	12	550	6.6	21	0	0	1	0	1	0	27	24
